# Supplementary material for: Imaging of Glioblastoma Tumor-Associated Myeloid Cells Using Nanobodies Targeting Signal Regulatory Protein Alpha
Source: PubMed Central journal article supplement (PMC8669144; doi:10.3389/fimmu.2021.777524), 2021-11-30
Supplement: DataSheet_2.pdf [file DataSheet_2.pdf]

**Supplementary Table 1:** Antibodies used in flow cytometry experiments: antigen, fluorophore, clone, lot number, ID (catalog number), manufacturer.

| <b>Antigen</b>             | <b>Fluorophore</b> | <b>Clone</b> | <b>Lot number</b> | <b>ID</b>  | <b>Manufacturer</b>         |
|----------------------------|--------------------|--------------|-------------------|------------|-----------------------------|
| CD11b                      | PE/cy7             | M1/70        | B227804           | 101216     | BioLegend                   |
| CD172a<br>(SIRP $\alpha$ ) | PE                 | P84          | B203321           | 144011     | BioLegend                   |
| CD45                       | APC/cy7            | 30-F11       | B242535           | 103115     | BioLegend                   |
| CX3CR1                     | FITC               | SA011F11     | B272301           | 149022     | BioLegend                   |
| F4/80                      | BV421              | T45-2342     | 8330526           | 565411     | BD Biosciences              |
| HIS                        | PE                 | J095G46      | B316502           | 362603     | BioLegend                   |
| HA                         | AF488              | 16B12        | 1971419           | A-21287    | Thermo Fisher<br>Scientific |
| I-A/I-E                    | PerCP/cy5.5        | M5/114.15.2  | B253463           | 107602     | BioLegend                   |
| Ly-6B.2                    | AF647              | 7/4          | 0513R             | MCA771A647 | Biorad                      |
